# Supplementary material for: Trends and Drivers of Inpatient Antibiotic Consumption among 89 China Tertiary General Hospitals from 2011Q1 to 2015Q4
Source: Hindawi journal article supplement (doi:10.1155/2018/5968653), 2018-11-01
Supplement: f1 [file 5968653.f1.pdf]

**Additional file 1: List and description of included data variables.**

| Variable            | Description                                                                                                                                                                                                                                                                                                                                                                                         |
|---------------------|-----------------------------------------------------------------------------------------------------------------------------------------------------------------------------------------------------------------------------------------------------------------------------------------------------------------------------------------------------------------------------------------------------|
| Hospital name       | Official name of the hospital.                                                                                                                                                                                                                                                                                                                                                                      |
| Province            | Province where the hospital was located. There are a total of 31 provinces in mainland China (excluding Hong Kong SAR, Macao SAR, and Taiwan province).                                                                                                                                                                                                                                             |
| Region <sup>a</sup> | <p>The region where the hospital was located. Based on differences in socio-economic development, mainland China is divided into four regions: eastern China, central China, western China, and western China; these include 10, 6, 12 and 3 provinces, respectively.</p> <p>Eastern China has the highest economic development, followed by central China, western China, and northeast China.</p> |
| Ownership           | <p>In terms of property rights, national hospitals belong to the central government, provincial hospitals belong to the local provincial government, and municipal hospitals belong to the local municipal government.</p> <p>In China, national hospitals are the most competitive, followed by provincial hospitals and municipal hospitals.</p>                                                  |
| Time                | Quarter in which data was reported, from 2011Q1 to 2015Q4.                                                                                                                                                                                                                                                                                                                                          |
| Drug type           | Anatomical Therapeutic and Chemical (ATC) classification J01.                                                                                                                                                                                                                                                                                                                                       |
| Drug generic name   | A drug marketed under its chemical name without advertising.                                                                                                                                                                                                                                                                                                                                        |
| Dosage form         | Unit dose, referring to the pharmaceutical drug product in the form in which it was marketed for use.                                                                                                                                                                                                                                                                                               |
| Drug specification  | Referring to the weight (or potency), content (%), or loading of the main drug in each tablet or other unit preparation.                                                                                                                                                                                                                                                                            |
| Drug amount         | Number of antibiotics used.                                                                                                                                                                                                                                                                                                                                                                         |
| Inpatient day       | Sum of the length of stay for all inpatients during the specified period; = number of hospitalization days for discharged patients × number of admissions.                                                                                                                                                                                                                                          |
| Drug cost           | The money spent on one specified generic drug.                                                                                                                                                                                                                                                                                                                                                      |

<sup>a</sup> Region was not captured in the database of the Center for Antibacterial Surveillance and was provided by the researchers according to province where the hospital was located.

**Addition file 2. Sample hospitals distribution.**

| Variables           | Sample hospitals |       | CAS member hospitals |        | Chi-square test |          |
|---------------------|------------------|-------|----------------------|--------|-----------------|----------|
|                     | n = 89           | %     | n = 192              | %      | $\chi^2$        | <i>p</i> |
| Province (n = 31)   | 30               | 96.77 | 31                   | 100.00 | 1.016           | 0.313    |
| Regions             |                  |       |                      |        | 2.337           | 0.505    |
| Eastern             | 38               | 42.70 | 93                   | 48.43  |                 |          |
| Central             | 22               | 24.72 | 35                   | 18.23  |                 |          |
| Western             | 17               | 19.10 | 43                   | 22.40  |                 |          |
| Northeastern        | 12               | 13.48 | 21                   | 10.94  |                 |          |
| Ownership           |                  |       |                      |        | 0.667           | 0.716    |
| National hospital   | 11               | 12.36 | 29                   | 15.10  |                 |          |
| Provincial hospital | 46               | 51.69 | 102                  | 53.13  |                 |          |
| Municipal hospital  | 32               | 35.95 | 61                   | 31.77  |                 |          |

Abbreviation: CAS, the Center for Antibacterial Surveillance.

**Additional file 3: Characteristics of tertiary general hospitals nationwide and insurance policies in 2011 and 2015.**

| Characteristic                                                                     | 2011      | 2015      |
|------------------------------------------------------------------------------------|-----------|-----------|
| China's tertiary general hospitals <sup>a</sup>                                    |           |           |
| Number of China's tertiary general hospitals                                       | 1399      | 2123      |
| Proportion of central financial subsidy (%)                                        | 7.76      | 8.19      |
| Drug share (%)                                                                     | 40.30     | 35.47     |
| Average number of beds (bed)                                                       | 874.61    | 964.59    |
| Average hospitalization day for discharged patients (day)                          | 12.00     | 10.40     |
| Average number of admissions (person)                                              | 26569     | 32167     |
| Average inpatient days (person day)                                                | 318828.00 | 334536.80 |
| Basic medical insurance policy <sup>b</sup>                                        |           |           |
| Basic medical insurance coverage (%)                                               | 94.91     | 96.51     |
| Total population (billion people)                                                  | 13.75     | 13.47     |
| Number of UEBMI participants (billion people)                                      | 2.52      | 2.89      |
| Number of NRCM participants (billion people)                                       | 8.32      | 6.34      |
| Number of URBMI and URRBMI participants (billion people)                           | 2.21      | 3.77      |
| Actual medical guarantee provided of UEBMI in hospitalization (%)                  | 73.00     | 72.80     |
| Actual medical guarantee provided of NRCM, URBMI and URRBMI in hospitalization (%) | 58.90     | 60.20     |

Abbreviation: UEBMI, Urban Employee Basic Medical Insurance; NRCM, New Rural Cooperative Medical Insurance; URBMI, Urban Resident Basic Medical Insurance; URRBMI, Urban and Rural Resident Basic Medical Insurance

Proportion of central financial subsidy = central financial subsidy / total hospital income × 100%

Drug share = drug income / total hospital income × 100%

Inpatient days = number of hospitalization days for discharged patients × number of admissions

Insurance coverage = number of UEBMI, NRCM, URBMI and URRBMI participants / total population × 100%

Actual compensation ratio = aggregate insurance benefit received in a single policy year / total medical expenses × 100%

<sup>a</sup> data was collected from *The National Statistical Yearbook* issued by the National Bureau of Statistical of China  
[URL:<http://navi.cnki.net/KNavi/YearbookDetail?pcode=CYFD&pykm=YSIFE&bh=>]

<sup>b</sup> data was collected from *The Annual Report on China's Social Insurance Development* issued by the Ministry of Human Resources and Social Security of China  
[URL:[http://www.mohrss.gov.cn/gkml/shbx/shbxjb/201802/t20180206\\_288037.html](http://www.mohrss.gov.cn/gkml/shbx/shbxjb/201802/t20180206_288037.html)]
